# Supplementary material
Source: Research Square preprint supplement (doi:10.21203/rs.3.rs-9625009/v1)

# Uncropped western blots

## Figure 2

### E

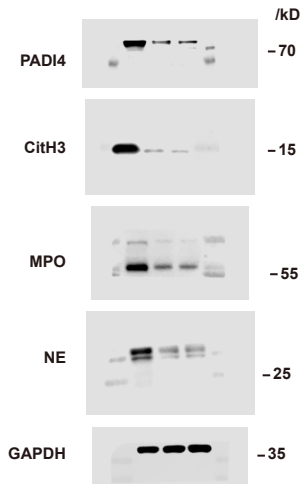

### F

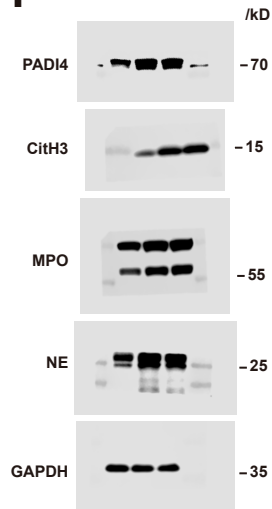

Figure 4

C

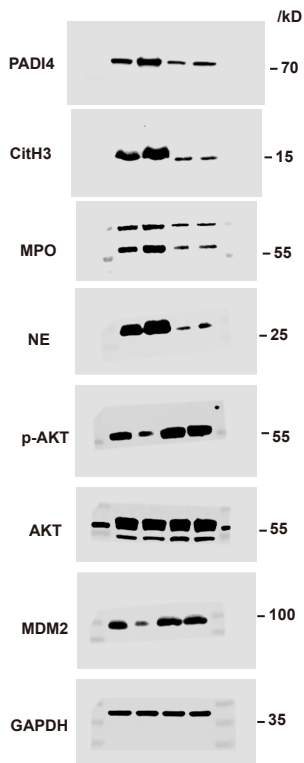

**Figure S1**

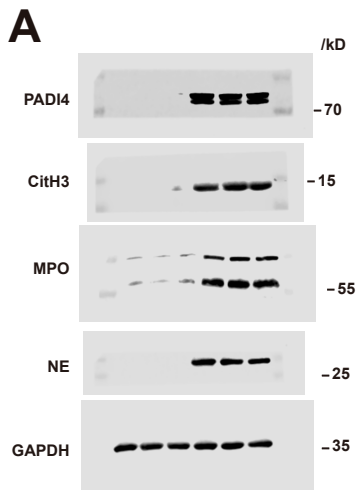

# Figure S2

## E

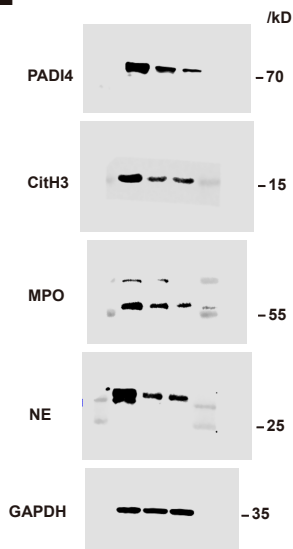

## F

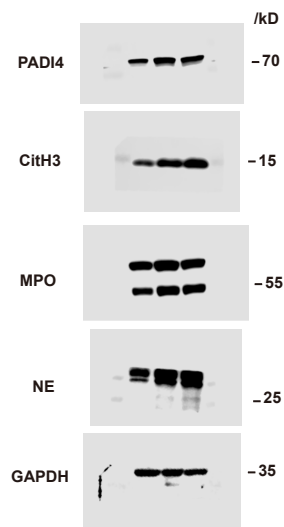

## M

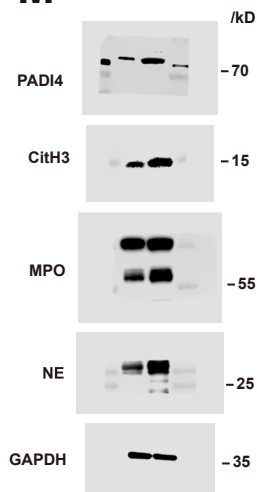

## N

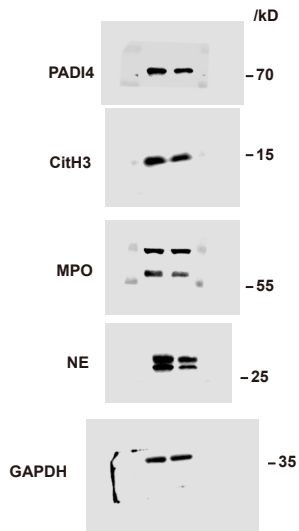

# Figure S3

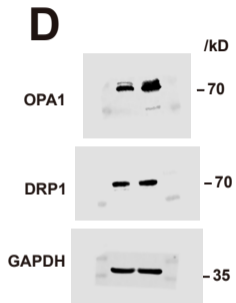

# Figure S5

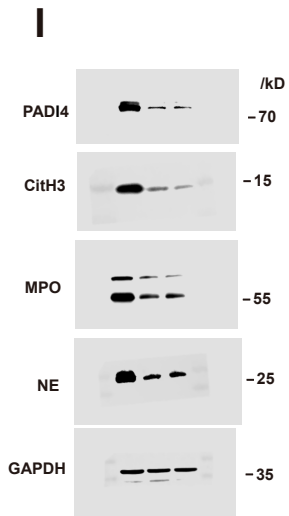

Supplement: Supplementary file 1 [file ab8a81eefdeea73e0fcf9de2.pdf]
